# Supplementary material
Source: publisher site journal article supplement (http://www.kjim.org/upload/media/kjim-2021-214-suppl2.pdf)
Supplement: Supplementary file 1 [file kjim-2021-214-suppl2.pdf]

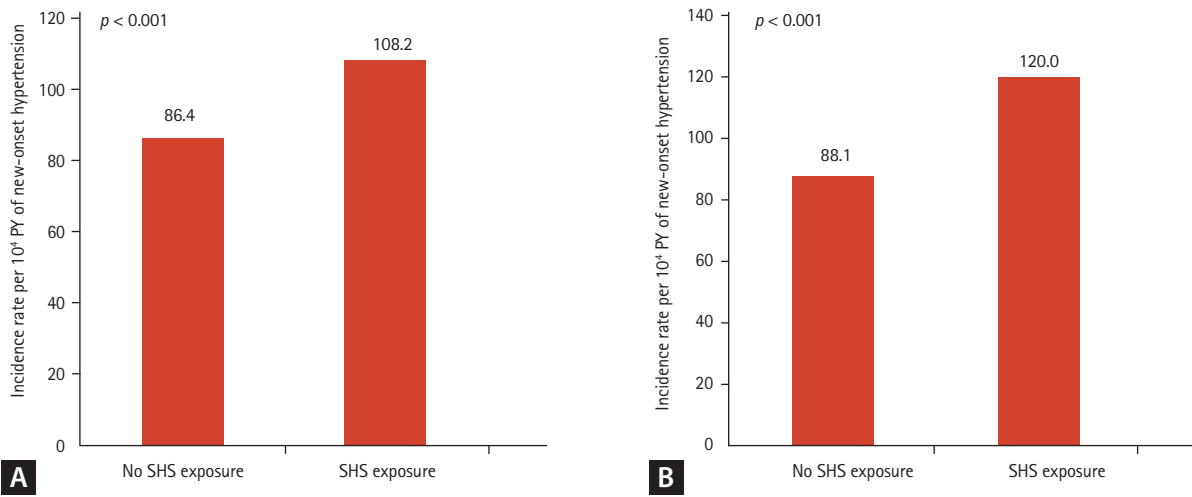

**Supplementary Figure 2.** Incidence rates per 10,000 person-year (PY) of new-onset hypertension between the two groups according to secondhand smoke (SHS) exposure at baseline and follow-up. (A) At baseline. (B) At follow-up. Chi-square test, all  $p < 0.001$ .
